1 **Determining distinct roles of IL-1 $\alpha$  through generation of an IL-1 $\alpha$**   
2 **knockout mouse with no defect in IL-1 $\beta$  expression**

3 R.K. Subbarao Malireddi<sup>1#</sup>, Ratnakar Bynigeri<sup>1#</sup>, Balabhaskararao Kancharana<sup>1</sup>, Bhesh Raj  
4 Sharma<sup>1</sup>, Amanda R. Burton<sup>1</sup>, Stephane Pelletier<sup>1</sup>, Thirumala-Devi Kanneganti<sup>1\*</sup>

5 <sup>1</sup>*Department of Immunology, St. Jude Children's Research Hospital, Memphis, TN, 38105, USA*

6

7 \*Correspondence to:

8 Thirumala-Devi Kanneganti

9 Department of Immunology, St. Jude Children's Research Hospital

10 MS #351, 262 Danny Thomas Place

11 Memphis, TN 38105-3678

12 Tel: (901) 595-3634; Fax: (901) 595-5766

13 E-mail: [Thirumala-Devi.Kanneganti@StJude.org](mailto:Thirumala-Devi.Kanneganti@StJude.org)

14 # These authors contributed equally to this work.

15

16 **Running title:** IL-1 $\alpha$  knockout mouse creation as a platform to identify unique cytokine functions

17 **Keywords:** PAMP, LPS, Pam3CSK, ATP, pathogen, innate immunity, inflammation,

18 inflammasome, IL-1, IL-1 $\alpha$ , IL-1 $\beta$ , cytokine, chemokine, KC, CXCL1, NLRP3, caspase, caspase-

19 1, gasdermin D, *Escherichia coli*, *Citrobacter rodentium*

20 **ABSTRACT**

21 Interleukin 1 $\alpha$  (IL-1 $\alpha$ ) and IL-1 $\beta$  are the founding members of the IL-1 cytokine family, and these  
22 innate immune inflammatory mediators are critically important in health and disease. Early studies  
23 on these molecules suggested that their expression was interdependent, with an initial genetic  
24 model of IL-1 $\alpha$  depletion, the IL-1 $\alpha$  KO mouse (*//1a-KO<sup>line1</sup>*), showing reduced IL-1 $\beta$  expression.  
25 However, studies using this line in models of infection and inflammation resulted in contrasting  
26 observations. To overcome the limitations of this genetic model, we have generated and  
27 characterized a new line of IL-1 $\alpha$  KO mice (*//1a-KO<sup>line2</sup>*) using CRISPR-Cas9 technology. In  
28 contrast to cells from the *//1a-KO<sup>line1</sup>*, where IL-1 $\beta$  expression was drastically reduced, bone  
29 marrow-derived macrophages (BMDMs) from *//1a-KO<sup>line2</sup>* mice showed normal induction and  
30 activation of IL-1 $\beta$ . Additionally, *//1a-KO<sup>line2</sup>* BMDMs showed normal inflammasome activation and  
31 IL-1 $\beta$  expression in response to multiple innate immune triggers, including both pathogen-  
32 associated molecular patterns and pathogens. Moreover, using *//1a-KO<sup>line2</sup>* cells, we confirmed  
33 that IL-1 $\alpha$ , independent of IL-1 $\beta$ , is critical for the expression of the neutrophil chemoattractant  
34 KC/CXCL1. Overall, we report the generation of a new line of IL-1 $\alpha$  KO mice and confirm functions  
35 for IL-1 $\alpha$  independent of IL-1 $\beta$ . Future studies on the unique functions of IL-1 $\alpha$  and IL-1 $\beta$  using  
36 these mice will be critical to identify new roles for these molecules in health and disease and  
37 develop therapeutic strategies.

## 38 INTRODUCTION

39 The IL-1 family of cytokines is a diverse family made up of potent inducers of inflammation.  
40 Members of this family can either prevent or promote disease, and they have been widely  
41 recognized as potential therapeutic targets (Lukens et al, 2012; Malik & Kanneganti, 2018; Ridker  
42 et al, 2017a; Ridker et al, 2017b; Ridker et al, 2011). The three members of the IL-1 sub-family,  
43 IL-1 $\alpha$ , IL-1 $\beta$ , and IL-1 receptor antagonist (IL-1RA), bind the same IL-1 receptor (IL-1R). The  
44 cytokines IL-1 $\alpha$  and IL-1 $\beta$  act as agonistic ligands, whereas IL-1RA is a strong antagonist;  
45 together, these molecules orchestrate robust proinflammatory immune responses (Dinarello,  
46 2009; Dinarello et al, 1974).

47 Among the IL-1 cytokines, significant overlap has been observed in the downstream processes  
48 they activate. However, there are also key differences between their expression and release and  
49 the biological processes they drive (Cavalli et al, 2021). The pro-form of IL-1 $\beta$  is biologically  
50 inactive and requires proteolytic processing for its activation. Inflammasome-dependent caspase-  
51 1 activation and pyroptosis are the major mechanisms responsible for IL-1 $\beta$  processing and  
52 release (Kanneganti, 2010; Kayagaki et al, 2015; Shi et al, 2015). Unlike IL-1 $\beta$ , the pro-form of  
53 IL-1 $\alpha$  is constitutively expressed in most cells from healthy hosts (Berda-Haddad et al, 2011;  
54 Kupper et al, 1986); it is also biologically active and can be present directly on the plasma  
55 membrane for signaling or released following membrane damage during various forms of cell  
56 death, making it a classic danger signal (Kaplanski et al, 1994; Kurt-Jones et al, 1985; Malik &  
57 Kanneganti, 2018).

58 As signaling molecules, a wide range of pathogen-associated and damage-associated molecular  
59 patterns (PAMPs and DAMPs) that activate innate immune signaling induce the expression and  
60 activation of both IL-1 $\alpha$  and IL-1 $\beta$  (Malik & Kanneganti, 2018; Mantovani et al, 2019). IL-1 family  
61 receptors carry the cytoplasmic TIR domain, a shared feature with pathogen sensing TLRs,  
62 making them excellent amplifiers of inflammatory signaling (Boraschi et al, 2018). Indeed,  
63 nanomolar doses of IL-1 $\alpha$  and IL-1 $\beta$  can trigger lethal inflammatory responses in mice and

64 humans (Dinarello, 1996; Lomedico et al, 1984; Smith et al, 1993). Consistently, IL-1 $\alpha$  and IL-1 $\beta$   
65 were shown to act as self-amplifying factors and upregulate each other via IL-1R signaling  
66 (Dinarello, 2009; Dinarello et al, 1987; Goldbach-Mansky et al, 2006; Greten et al, 2007; Warner  
67 et al, 1987). However, studies of IL-1 $\alpha$  and IL-1 $\beta$  have produced conflicting results with regard to  
68 how these cytokines regulate each other. Studies focused on TLR triggers reported that these  
69 self-amplifying positive feedback mechanisms are redundant or not important to amplify the  
70 production of IL-1 $\alpha$  and IL-1 $\beta$  further (Almog et al, 2015; Copenhaver et al, 2015; Fettelschoss et  
71 al, 2011; Glaccum et al, 1997; Labow et al, 1997). These observations differed from studies using  
72 a genetic *Il1a* knockout mice (hereafter referred to as *Il1a*-KO<sup>line1</sup>), which showed substantial  
73 reduction in IL-1 $\beta$  production when *Il1a* was deleted (Dagvadorj et al, 2021; Gross et al, 2012;  
74 Horai et al, 1998), suggesting that IL-1 $\alpha$  may regulate IL-1 $\beta$  expression even during TLR  
75 activation. These conclusions remained debated and poorly understood for many years.  
76 Therefore, we sought to generate a new line of *Il1a* knockout mice (hereafter referred to as *Il1a*-  
77 KO<sup>line2</sup>) using CRISPR-Cas9 technology. The newly generated *Il1a*-KO<sup>line2</sup> mice showed normal  
78 development, with comparable levels of basal immune cells in the blood compared with wild-type  
79 (WT) mice. Bone marrow-derived macrophages (BMDMs) prepared from the *Il1a*-KO<sup>line2</sup> mice  
80 showed no defect in expression or activation of inflammasome components in response to  
81 PAMPs and live pathogen triggers. Additionally, while the cells from *Il1a*-KO<sup>line1</sup> showed reduced  
82 expression of both IL-1 $\alpha$  and IL-1 $\beta$ , *Il1a*-KO<sup>line2</sup> macrophages had no expression of IL-1 $\alpha$  but near-  
83 normal expression of IL-1 $\beta$ . Moreover, the *Il1a*-KO<sup>line2</sup> BMDMs showed a specific requirement of  
84 IL-1 $\alpha$  for the expression of neutrophil chemoattractant KC/CXCL1, further confirming the  
85 functional accuracy of the KO. In summary, we generated and characterized a new line of IL-1 $\alpha$   
86 KO mice that improve upon the previous version and have normal IL-1 $\beta$  expression. These mice  
87 can be broadly used for future studies on the unique functions of IL-1 $\alpha$  and IL-1 $\beta$  to establish their  
88 relevance in health and disease and identify new treatment strategies.

## 89 RESULTS

### 90 Generation of the IL-1 $\alpha$ KO (*Il1a*-KO<sup>line2</sup>) mouse using CRISPR/Cas9 technology

91 Although IL-1 $\alpha$  has long been recognized as a critical regulator of inflammation and immune  
92 responses (Cavalli et al, 2021), its specific functions in physiologic and pathologic inflammatory  
93 outcomes in health and disease remain unclear. IL-1 $\alpha$  is subjected to complex regulation, and  
94 early genetic studies using different knockout mice produced conflicting observations (Dagvadorj  
95 et al, 2021; Fettelschoss et al, 2011; Gross et al, 2012; Horai et al, 1998). To clarify the previously  
96 observed contradictory roles of IL-1 $\alpha$  in IL-1 $\beta$  expression in *Il1a*-KO<sup>line1</sup> mice, we generated a new  
97 line of IL-1 $\alpha$  knockout (KO) mice using CRISPR-Cas9 technology, referred to here as *Il1a*-KO<sup>line2</sup>  
98 (Fig. 1). Exons 2-5 of the *Il1a* gene were deleted by using simultaneous injection of two individual  
99 gRNAs with human codon optimized Cas9 mRNA (Fig. 1A). We opted to use pronuclear-staged  
100 C57BL/6J zygotes for the injections to minimize the background-related genetic issues.  
101 Successful generation of the *Il1a*-deficient mice was assessed by targeted deep sequencing and  
102 further confirmed by PCR amplification of genomic DNA from the WT and mutant alleles (Fig. 1B),  
103 and western blot analysis to confirm the loss of IL-1 $\alpha$  protein production (Fig. 2A). Additionally,  
104 because IL-1 $\alpha$  is a multifaceted cytokine that we postulated may have a role in regulating immune  
105 cell phenotypes at basal levels, we evaluated the immune cellularity in the blood from the newly  
106 generated CRISPR *Il1a*<sup>-/-</sup> mice (*Il1a*-KO<sup>line2</sup>). We found that these mice did not show any gross  
107 abnormalities in the immune cellularity (S. Fig. 1A–B). In sum, we generated a new line of IL-1 $\alpha$   
108 knockout mice, *Il1a*-KO<sup>line2</sup>, and confirmed the loss of IL-1 $\alpha$  expression with no defects in overall  
109 blood immune cellularity.

110

### 111 CRISPR-based genetic deletion of *Il1a* does not affect IL-1 $\beta$ expression or activation

112 Both IL-1 $\alpha$  and IL-1 $\beta$  are known to be highly induced in response to pathogenic insults. Therefore,  
113 we next sought to characterize the cytokine expression in cells from the newly generated *Il1a*-  
114 KO<sup>line2</sup> mice in response to PAMPs and pathogens. Treatment of BMDMs with lipopolysaccharide

115 (LPS, a toll-like receptor 4 (TLR4) agonist from Gram-negative bacteria) induced robust and time-  
116 dependent expression of IL-1 $\alpha$  protein in WT cells but not in *Il1a*-KO<sup>line2</sup> cells (Fig. 2A). In addition,  
117 the induction of IL-1 $\alpha$  protein expression was not affected by IL-1 $\beta$  genetic deletion, and the  
118 expression of IL-1 $\beta$  in response to LPS was similar in the WT and *Il1a*-KO<sup>line2</sup> cells (Fig. 2A). In  
119 contrast, we observed a delay and reduction in the production of IL-1 $\beta$  in the previously generated  
120 *Il1a*-KO<sup>line1</sup> cells in response to LPS (S. Fig. 2A).

121 To further understand potential interconnections between IL-1 $\alpha$  and IL-1 $\beta$ , we evaluated NLRP3  
122 inflammasome priming, which is known to produce mature IL-1 $\beta$ . We found that IL-1 $\alpha$  was not  
123 required for upregulation of NLRP3 or IL-1 $\beta$  expression in response to the innate immune triggers  
124 LPS, LPS plus ATP, Pam3CSK4 (Pam3) plus ATP, or Gram-negative bacteria *Escherichia coli* or  
125 *Citrobacter rodentium* (Fig. 2A–C). Moreover, the activation of canonical and non-canonical  
126 inflammasomes, as measured by cleavage of caspase-1 and gasdermin D (GSDMD), were not  
127 reduced by deletion IL-1 $\alpha$  (Fig. 2B–C). Consistently, IL-1 $\beta$  release was similar in WT and *Il1a*-  
128 KO<sup>line2</sup> BMDMs (Fig. 2D–E). In contrast, using similar experimental approaches, we observed  
129 defects in IL-1 $\beta$  expression in macrophages from the earlier *Il1a*-KO<sup>line1</sup> line, with pronounced  
130 reductions in IL-1 $\beta$  expression at early time points in response to LPS, while the induction  
131 improved at later timepoints (S. Fig. 2A). We also observed reductions in IL-1 $\beta$  expression in  
132 response to NLRP3 inflammasome triggers LPS plus ATP and Pam3 plus ATP (S. Fig. 2B). We  
133 did not observe defects in NLRP3 production or caspase-1 and GSDMD activation in *Il1a*-KO<sup>line1</sup>  
134 cells (S. Fig. 2A–B). Together, these results show that while the previously generated *Il1a*-KO<sup>line1</sup>  
135 line had defects in IL-1 $\beta$  production, *Il1a*-KO<sup>line2</sup> mice did not share these defects.

136

### 137 **CRISPR-based genetic deletion of *Il1a* confirms its critical role in the expression of the** 138 **chemokine KC (CXCL1)**

139 IL-1 $\alpha$  is a pleiotropic cytokine and critical amplifier of inflammation in response to both infection  
140 and sterile cellular insults (Cavalli et al, 2021). IL-1 $\alpha$  also plays key roles in regulating neutrophil-

141 chemotactic factors such as the chemokine KC (CXCL1) in mice (Gurung et al, 2017). Therefore,  
142 to further confirm the IL-1 $\alpha$  deletion in the newly generated *Il1a*-KO<sup>line2</sup> mice and assess its  
143 functional effects, we evaluated expression of TNF and KC in response to innate immune triggers.  
144 We found that IL-1 $\alpha$  specifically was required to produce KC, but not TNF, in response to both  
145 PAMP- and pathogen-induced signaling in macrophages; loss of IL-1 $\alpha$  resulted in significant  
146 decreases in KC release, while loss of IL-1 $\beta$  did not decrease KC release (Fig. 3A–D). Instead,  
147 we observed significantly increased levels of KC production in *Il1b*<sup>-/-</sup> cells in response to LPS plus  
148 ATP and Pam3 plus ATP treatments (Fig. 3A), suggesting a competition between IL-1 $\alpha$  and IL-  
149 1 $\beta$  for IL-1R binding in this context, where the increased availability of IL-1R molecules for binding  
150 by IL-1 $\alpha$  may promote hyper-expression of select inflammatory factors in the absence of IL-1 $\beta$ .  
151 Together, these findings confirm the specific role of IL-1 $\alpha$  for the release of KC, further supporting  
152 the functional relevance of the newly created *Il1a*-KO<sup>line2</sup> mice for the evaluation of IL-1 $\alpha$ -  
153 mediated signaling and disease phenotypes.

154 **DISCUSSION**

155 Members of the IL-1 family of cytokines play important roles as inflammatory mediators in host  
156 defense but have also been implicated in disease pathogenesis. Therefore, understanding the  
157 distinct functions of IL-1 family members is fundamental to our understanding of the molecular  
158 basis of disease. Previous genetic models of IL-1 $\alpha$  deletion have displayed defects in IL-1 $\beta$   
159 production, making it difficult to determine the distinct roles of these molecules in immune  
160 responses. To overcome this obstacle, we report the generation of a genetic deletion of IL-1 $\alpha$  in  
161 mice using CRISPR technology that did not affect IL-1 $\beta$  induction in response to microbial PAMPs  
162 and pathogens. Our findings suggest that expression of IL-1 $\beta$  in response to TLR activation is not  
163 affected by loss of IL-1 $\alpha$ .

164 Growing evidence supports that IL-1 $\alpha$  and IL-1 $\beta$  have distinct functions (Di Paolo et al, 2009;  
165 Eigenbrod et al, 2008; Sakurai et al, 2008). Our findings further confirm that IL-1 $\alpha$  is a non-  
166 redundant positive regulator of the expression of the chemokine KC in macrophages, which is  
167 consistent with earlier studies reporting the specific role of IL-1 $\alpha$  in promoting production and  
168 recruitment of neutrophils in chronic inflammatory conditions (Gurung et al, 2017; Kono et al,  
169 2010; Lukens et al, 2013; Thornton et al, 2010). However, IL-1 $\beta$  has also been shown to be  
170 important for the induction of neutrophil growth- and chemotactic-factors (Cassel et al, 2014;  
171 Eislmayr et al, 2022; Gurung et al, 2016; Hsu et al, 2011; Lukens et al, 2014a). Therefore, it is  
172 plausible that IL-1 $\beta$  might also contribute to neutrophil-mediated inflammatory conditions as a  
173 result of the activation of cell death modalities that drive IL-1 $\beta$  maturation via the activation of  
174 caspase-1 or other proteases (Place & Kanneganti, 2019), though this requires further study.

175 Additionally, previous studies using the earlier *Il1a*-KO<sup>line1</sup> mice distinguished unique functions of  
176 IL-1 $\alpha$  and IL-1 $\beta$  in the development of chronic autoinflammatory diseases (Cassel et al, 2014;  
177 Lukens et al, 2014a; Lukens et al, 2014b; Lukens et al, 2013; Malik et al, 2016). Our results  
178 suggest that the ability to use the *Il1a*-KO<sup>line1</sup> mice to successfully identify this differential  
179 phenotype is due to the chronic nature of the disease. We found that the reduction of IL-1 $\beta$



180 expression in *Il1a*-KO<sup>line1</sup> cells was pronounced only at early time points following stimulation, and  
181 that prolonged stimulation resulted in similar levels of IL-1 $\beta$  in WT and *Il1a*-KO<sup>line1</sup> cells, in  
182 response to both PAMPs and pathogens. This suggests that WT and *Il1a*-KO<sup>line1</sup> mice would have  
183 similar levels of IL-1 $\beta$  during chronic disease, allowing differential phenotypes between *Il1b*<sup>-/-</sup> and  
184 *Il1a*<sup>-/-</sup> mice to be observed.

185 Given the critical roles of IL-1 family cytokines in inflammation and pathology, these cytokines  
186 have been targeted in several therapeutic strategies which have further highlighted unique  
187 functions for IL-1 $\alpha$  and IL-1 $\beta$ . For example, the recent SAVE-MORE trial showed that anakinra,  
188 which blocks both IL-1 $\alpha$  and IL-1 $\beta$ , reduced the risk of clinical progression in patients with COVID-  
189 19, when co-administered with dexamethasone (Kyriazopoulou et al, 2021). Accordingly,  
190 anakinra was authorized for the treatment of COVID-19 in Europe by the EMA. In contrast, the  
191 CAN-COVID trial, which was designed to evaluate the efficacy of canakinumab (a specific IL-1 $\beta$   
192 blocking antibody) failed to improve the survival of patients with COVID-19 (Caricchio et al, 2021).  
193 These studies further expand the concept that IL-1 $\alpha$  plays a dominant and potentially specific role  
194 in driving IL-1 $\beta$ -independent inflammatory immune responses and pathology in some contexts.  
195 Together, these observations show that caution should be used when interpreting previous  
196 studies and highlight the need to authenticate genetic resources for future work. The development  
197 of the *Il1a*-KO<sup>line2</sup> mouse line, which does not display acute or chronic defects in IL-1 $\beta$  production,  
198 may help address many of the critical, long-standing questions in the field regarding the shared  
199 and unique functions and context-dependent interdependencies of IL-1 $\alpha$  and IL-1 $\beta$  cytokines to  
200 improve understanding of the molecular basis of disease and inform therapeutic strategies.

## 201 MATERIALS AND METHODS

### 202 Mice

203 *Il1b*<sup>-/-</sup> (Shornick et al, 1996) and *Il1a*<sup>-/-</sup> (*Il1a*-KO<sup>line1</sup>) (Matsuki et al, 2006) mice were both  
204 previously described. *Il1a*<sup>-/-</sup> (*Il1a*-KO<sup>line2</sup>) mice were generated in the current study and are  
205 described below. All mice were generated on or extensively backcrossed to the C57/BL6  
206 background. All mice were bred at the Animal Resources Center at St. Jude Children's Research  
207 Hospital and maintained under specific pathogen-free conditions. Mice were maintained with a 12  
208 h light/dark cycle and were fed standard chow. Animal studies were conducted under protocols  
209 approved by the St. Jude Children's Research Hospital committee on the Use and Care of  
210 Animals.

211

### 212 Generation of the new IL-1a KO (*Il1a*-KO<sup>line2</sup>) mouse strain

213 The new *Il1a*-KO<sup>line2</sup> mouse was generated using CRISPR/Cas9 technology in collaboration with  
214 the St. Jude Transgenic/Gene Knockout Shared Resource facility. Pronuclear-staged C57BL/6J  
215 zygotes were injected with human codon-optimized Cas9 mRNA transcripts (50 ng/μl) combined  
216 with two guide RNAs (120 ng/μl each; sgRNA1 for the 5' of exon 2:  
217 AAAAGCTTCTGACGTACCACagg, and sgRNA2 for the 3' of exon 5:  
218 AAGTAACAGCGGAGCGCTT Ttgg (pam sequences are underlined)) to generate a long deletion  
219 encompassing exons (E) 2–5 of the *Il1a* gene (Fig. S1A). Zygotes were surgically transplanted  
220 into the oviducts of pseudo-pregnant CD1 females, and newborn mice carrying the desired  
221 deletion in the *Il1a* allele were identified by PCR agarose gel-electrophoresis (Fig. 1B) and Sanger  
222 sequencing. The WT allele was PCR amplified by using the primers IL1a\_F1 (5'-  
223 GGGCACACGAATTCACACTCACA-3') and IL1a\_R1 (5'-  
224 GGAGAACTTGGTTCCTGTTAGGGTGA-3'), and the KO allele was amplified by using IL1a\_F1  
225 and IL1a\_R2 (5'- TGATTAGCTTCCTTTGGGCTTTGA-3') primer pairs. The details of the  
226 generation of the CRISPR reagents were described previously (Pelletier et al, 2015). The

227 uniqueness of sgRNAs and the off-target sites with fewer than three mismatches were found using  
228 the Cas-OFFinder algorithm (Bae et al, 2014).

229

### 230 **Macrophage differentiation and stimulation**

231 BMDMs were prepared as described previously (Gurung et al, 2012). In short, bone marrow cells  
232 were cultured in IMDM supplemented with 30% L929 cell-conditioned medium, 10% FBS, 1%  
233 nonessential amino acids, and 1% penicillin-streptomycin for 6 days to differentiate into  
234 macrophages. On day 6, BMDMs were counted and seeded at  $10^6$  cells per well in 12-well culture  
235 plates in DMEM containing 10% FBS, 1% nonessential amino acids, and 1% penicillin-  
236 streptomycin. iBMDMs (immortalized BMDMs from *Il1a*<sup>-/-</sup> (*Il1a*-KO<sup>line1</sup>) mice) were maintained in  
237 DMEM supplemented with 5% L929 cell-conditioned medium, 10% FBS, 1% nonessential amino  
238 acid, and 1% penicillin-streptomycin. Stimulations were performed with LPS alone (100 ng/ml) for  
239 the indicated times, LPS (100 ng/ml) or Pam3 (1  $\mu$ g/ml) for 3.5 h followed by the addition of ATP  
240 (5 mM final concentration) for 30 min, or *E. coli* (MOI, 20) or *C. rodentium* (MOI, 20) for 24 h.

241

### 242 **Flow cytometry and analysis of cellularity**

243 The cellular phenotypes of immune cells in the blood were analyzed either by flow cytometry (for  
244 T cell subsets and B cells) or by using an automated hematology analyzer machine (for &  
245 lymphocytes, % neutrophils, % monocytes, red blood cell (RBC) counts, hemoglobin (HB)  
246 quantification, and platelet (PLT) quantification). The following antibodies were used for cell  
247 staining: anti-CD19 (APC, clone ID3), anti-CD45.2 (FITC, clone 104), and anti-TCR $\beta$  (PECy7,  
248 clone H57-597) from Biolegend, and anti-CD8a (efluor450, clone 53-6.7) from eBiosciences. Data  
249 were acquired on LSR II Flow Cytometer from BD Biosciences, and analyzed using the FlowJo  
250 software (Tree Star), version 10.2 (FlowJo LLC).

251

### 252 **Western blotting**

253 Samples for immunoblotting of caspase-1 were prepared by mixing the cell lysates with culture  
254 supernatants (lysis buffer: 5% NP-40 solution in water supplemented with 10 mM DTT and  
255 protease inhibitor solution at 1× final concentration); samples for all other protein immunoblotting  
256 were prepared without the supernatants in RIPA lysis buffer. Samples were mixed and denatured  
257 in loading buffer containing SDS and 100 mM DTT and boiled for 12 min. SDS-PAGE-separated  
258 proteins were transferred to PVDF membranes and immunoblotted with primary antibodies  
259 against IL-1 $\alpha$  (503207, Biolegend), IL-1 $\beta$  (12426, Cell Signaling Technology), caspase-1 (AG-  
260 20B-0042; Adipogen), NLRP3 (AG-20B-0014; Adipogen), GSDMD (ab209845, Abcam), and  $\beta$ -  
261 Actin (sc-47778 HRP, Santa Cruz), Appropriate horseradish peroxidase (HRP)-conjugated  
262 secondary antibodies (anti-Armenian hamster [127-035-099], anti-mouse [315-035-047], and  
263 anti-rabbit [111-035-047], Jackson ImmunoResearch Laboratories) were used as described  
264 previously (Tweedell et al, 2020). Immunoblot images were acquired on an Amersham Imager  
265 using Immobilon<sup>®</sup> Forte Western HRP Substrate (WBLUF0500, Millipore).

266

### 267 **Cytokine analysis**

268 Cytokines and chemokines were measured by multiplex ELISA (Millipore), as per the  
269 manufacturer instructions.

270

### 271 **Statistical analysis**

272 GraphPad Prism 9.0 software was used for data analysis. Data are presented as mean  $\pm$  SEM.

273 Statistical significance was determined by *t* tests (two-tailed) for two groups.

274 **DATA AVAILABILITY**

275 The data generated and presented in the current study are provided within the manuscript and  
276 the accompanying supplementary figures.

277

278 **ACKNOWLEDGMENTS**

279 We thank all the members of the Kanneganti laboratory for their comments and suggestions  
280 during the development of this manuscript. We thank R. Tweedell, PhD, and J. Gullett, PhD, for  
281 scientific editing and writing support, and Katie Combs and Lauren Kneeland for mouse colony  
282 support.

283

284 **FUNDING**

285 Work from our laboratory is supported by the US National Institutes of Health (AI101935,  
286 AI124346, AI160179, AR056296, and CA253095 to T.-D.K.) and the American Lebanese Syrian  
287 Associated Charities (to T.-D.K.). The content is solely the responsibility of the authors and does  
288 not necessarily represent the official views of the National Institutes of Health.

289

290 **AUTHOR CONTRIBUTIONS**

291 R.K.S.M. and T.-D.K. designed the study. R.K.S.M., R.B., B.K., and B.R.S. performed  
292 experiments. A.R.B. and S.P. performed the CRISPR-based knockout generation and initial  
293 breeding. R.K.S.M., R.B., and T.-D.K. analyzed the data. R.K.S.M. and R.B. wrote the manuscript  
294 with input from all authors. T.-D.K. oversaw the project.

295

296 **AUTHOR INFORMATION**

297 T.-D.K. is a consultant for Pfizer. Correspondence and requests for materials should be  
298 addressed to [thirumala-devi.kanneganti@stjude.org](mailto:thirumala-devi.kanneganti@stjude.org).

299 **FIGURE LEGENDS**

300 **Figure 1. Generation of the *Il1a*<sup>-/-</sup> (*Il1a*-KO<sup>line2</sup>) mouse using CRISPR/Cas9 technology**

301 **(A)** Two sgRNAs targeting the *Il1a* locus were designed and used to delete exons 2 to 5 (E2 to  
302 E5), as described in the materials and methods section. The vertical bars denote the sgRNAs 1  
303 and 2, respectively (depictions are not to the scale) in the genomic sequence. The location of the  
304 deleted genomic fragment and the primer-binding locations are depicted using short arrows.  
305 **(B)** The PCR amplification of the *Il1a* locus from the DNA of wild-type (WT), heterozygous, (Het),  
306 or knockout (KO) mice using the primers (primers P1 and P2 together with P3).

307

308 **Figure 2. CRISPR-based genetic deletion of *Il1a* (*Il1a*-KO<sup>line2</sup>) does not affect IL-1 $\beta$**   
309 **expression or activation**

310 **(A)** Western blot analysis of pro-IL-1 $\alpha$  (P31), pro-IL-1 $\beta$  (P31), NLRP3 (P110), and  $\beta$ -Actin (P42)  
311 in bone marrow-derived macrophages (BMDMs) treated with LPS for indicated times. **(B–C)**  
312 Western blot analysis pro- (P45) and activated (P20) caspase-1 (CASP1), pro- (P53) and  
313 activated (P30) gasdermin D (GSDMD), pro-IL-1 $\alpha$  (P31), pro-IL-1 $\beta$  (P31), and  $\beta$ -Actin (P42) in  
314 BMDMs treated with LPS + ATP or Pam3 + ATP for 4 h **(B)**, or BMDMs infected with *E. coli* or *C.*  
315 *rodentium* for 24 h **(C)**. **(D–E)** Measurement of IL-1 $\beta$  release in the cellular supernatants collected  
316 from BMDMs treated as detailed in panels **(B)** and **(C)**, respectively, for **(D)** and **(E)**. Western blot  
317 of  $\beta$ -actin was used as loading control. Data are representative of at least two independent  
318 experiments (A–E). Data are presented as the mean  $\pm$  SEM (D and E). Analyses of the *P* values  
319 were performed using the *t* test (D and E). ns, non-significant; \*\**P* < 0.01; \*\*\**P* < 0.001; \*\*\*\**P* <  
320 0.0001.

321

322 **Figure 3. CRISPR-based genetic deletion of *Il1a* (*Il1a*-KO<sup>line2</sup>) confirms its critical role in the**  
323 **expression of the chemokine KC (CXCL1)**

324 (A–D) Measurement of secreted cytokines KC and TNF in bone marrow-derived macrophages  
325 (BMDMs) treated with LPS + ATP or Pam3 + ATP for 4 h (A–B) or infected with *E. coli* or *C.*  
326 *rodentium* for 24 h (C–D). Data are representative of at least two independent experiments (A–  
327 D). Data are presented as the mean ± SEM (A–D). Analyses of the *P* values were performed  
328 using the *t* test (A–D). ns, non-significant; \**P* < 0.05; \*\**P* < 0.01; \*\*\*\**P* < 0.0001.

329 **SUPPLEMENTAL FIGURE LEGENDS**

330 **Supplemental Figure 1. The newly generated CRISPR (*Il1a*-KO<sup>line2</sup>) mice do not show gross**  
331 **abnormalities in blood immune cellularity**

332 **(A)** Measurement of complete blood counts using automated hematology to analyze percentages  
333 of lymphocytes, neutrophils, and monocytes in the total blood cell population, as well as red blood  
334 cell (RBC) counts, hemoglobin levels (HB), and platelet (PLT) counts from wild-type (WT), *Il1a*<sup>-/-</sup>  
335 (*Il1a*-KO<sup>line2</sup>), and *Il1b*<sup>-/-</sup> mice. **(B)** Flow cytometry-based quantification of the percent B cells, T  
336 cells, and CD4<sup>+</sup> T and CD8<sup>+</sup> T cell subsets among the CD45.2<sup>+</sup> hematopoietic cells from the blood  
337 collected from WT, *Il1a*<sup>-/-</sup> (*Il1a*-KO<sup>line2</sup>) and *Il1b*<sup>-/-</sup> mice. Data are representative of at least two  
338 independent experiments of 5 to 7 animals per group (A–B). Data are presented as the mean ±  
339 SEM (A–B). Analyses of the *P* values were performed using the *t* test (A–B). ns, non-significant.

340

341 **Supplemental Figure 2. Previously generated *Il1a*<sup>-/-</sup> (*Il1a*-KO<sup>line1</sup>) cells have defective IL-1β**  
342 **expression**

343 **(A)** Western blot analysis of pro-IL-1α (P31), pro-IL-1β (P31), NLRP3 (P110), and β-Actin (P42)  
344 in immortalized bone marrow-derived macrophages (iBMDMs) treated with LPS for indicated  
345 times. **(B)** Western blot analysis of pro-IL-1α (P31), pro-IL-1β (P31), NLRP3 (P110), pro- (P45)  
346 and activated (P20) caspase-1 (CASP1), pro- (P53) and activated (P30) GSDMD, and β-Actin  
347 (P42) in iBMDMs treated with PBS (Vehi), LPS + ATP, or Pam3 + ATP for 4 h or infected with *E.*  
348 *coli* (EC) or *Citrobacter* (Citro) for 24 h. Western blot of β-actin was used as loading control. Data  
349 are representative of at least two independent experiments (A–B).



350 **REFERENCES**

- 351 Almog, T., Kandel-Kfir, M., Shaish, A., Dissen, M., Shlomai, G., Voronov, E., Apte, R. N., Harats,  
352 D. & Kamari, Y. (2015) Knockdown of interleukin-1 $\alpha$  does not attenuate LPS-induced production  
353 of interleukin-1 $\beta$  in mouse macrophages. *Cytokine*, 73(1), 138-43.
- 354 Bae, S., Park, J. & Kim, J. S. (2014) Cas-OFFinder: a fast and versatile algorithm that searches  
355 for potential off-target sites of Cas9 RNA-guided endonucleases. *Bioinformatics*, 30(10), 1473-5.
- 356 Berda-Haddad, Y., Robert, S., Salers, P., Zekraoui, L., Farnarier, C., Dinarello, C. A., Dignat-  
357 George, F. & Kaplanski, G. (2011) Sterile inflammation of endothelial cell-derived apoptotic bodies  
358 is mediated by interleukin-1alpha. *Proc Natl Acad Sci U S A*, 108(51), 20684-9.
- 359 Boraschi, D., Italiani, P., Weil, S. & Martin, M. U. (2018) The family of the interleukin-1 receptors.  
360 *Immunol Rev*, 281(1), 197-232.
- 361 Caricchio, R., Abbate, A., Gordeev, I., Meng, J., Hsue, P. Y., Neogi, T., Arduino, R., Fomina, D.,  
362 Bogdanov, R., Stepanenko, T., Ruiz-Seco, P., Gonzalez-Garcia, A., Chen, Y., Li, Y., Whelan, S.,  
363 Noviello, S. & Investigators, C.-C. (2021) Effect of Canakinumab vs Placebo on Survival Without  
364 Invasive Mechanical Ventilation in Patients Hospitalized With Severe COVID-19: A Randomized  
365 Clinical Trial. *JAMA*, 326(3), 230-239.
- 366 Cassel, S. L., Janczy, J. R., Bing, X., Wilson, S. P., Olivier, A. K., Otero, J. E., Iwakura, Y.,  
367 Shayakhmetov, D. M., Bassuk, A. G., Abu-Amer, Y., Brogden, K. A., Burns, T. L., Sutterwala, F.  
368 S. & Ferguson, P. J. (2014) Inflammasome-independent IL-1beta mediates autoinflammatory  
369 disease in Pstpip2-deficient mice. *Proc Natl Acad Sci U S A*, 111(3), 1072-7.
- 370 Cavalli, G., Colafrancesco, S., Emmi, G., Imazio, M., Lopalco, G., Maggio, M. C., Sota, J. &  
371 Dinarello, C. A. (2021) Interleukin 1alpha: a comprehensive review on the role of IL-1alpha in the  
372 pathogenesis and treatment of autoimmune and inflammatory diseases. *Autoimmun Rev*, 20(3),  
373 102763.

374 Copenhaver, A. M., Casson, C. N., Nguyen, H. T., Duda, M. M. & Shin, S. (2015) IL-1R signaling  
375 enables bystander cells to overcome bacterial blockade of host protein synthesis. *Proc Natl Acad*  
376 *Sci U S A*, 112(24), 7557-62.

377 Dagvadorj, J., Mikulska-Ruminska, K., Tumurkhuu, G., Ratsimandresy, R. A., Carriere, J.,  
378 Andres, A. M., Marek-Iannucci, S., Song, Y., Chen, S., Lane, M., Dorfleutner, A., Gottlieb, R. A.,  
379 Stehlik, C., Cassel, S., Sutterwala, F. S., Bahar, I., Crother, T. R. & Ardit, M. (2021) Recruitment  
380 of pro-IL-1alpha to mitochondrial cardiolipin, via shared LC3 binding domain, inhibits mitophagy  
381 and drives maximal NLRP3 activation. *Proc Natl Acad Sci U S A*, 118(1).

382 Di Paolo, N. C., Miao, E. A., Iwakura, Y., Murali-Krishna, K., Aderem, A., Flavell, R. A.,  
383 Papayannopoulou, T. & Shayakhmetov, D. M. (2009) Virus binding to a plasma membrane  
384 receptor triggers interleukin-1 alpha-mediated proinflammatory macrophage response in vivo.  
385 *Immunity*, 31(1), 110-21.

386 Dinarello, C. A. (1996) Biologic basis for interleukin-1 in disease. *Blood*, 87(6), 2095-147.

387 Dinarello, C. A. (2009) Immunological and inflammatory functions of the interleukin-1 family. *Annu*  
388 *Rev Immunol*, 27, 519-50.

389 Dinarello, C. A., Goldin, N. P. & Wolff, S. M. (1974) Demonstration and characterization of two  
390 distinct human leukocytic pyrogens. *J Exp Med*, 139(6), 1369-81.

391 Dinarello, C. A., Ikejima, T., Warner, S. J., Orencole, S. F., Lonnemann, G., Cannon, J. G. &  
392 Libby, P. (1987) Interleukin 1 induces interleukin 1. I. Induction of circulating interleukin 1 in rabbits  
393 in vivo and in human mononuclear cells in vitro. *J Immunol*, 139(6), 1902-10.

394 Eigenbrod, T., Park, J. H., Harder, J., Iwakura, Y. & Nunez, G. (2008) Cutting edge: critical role  
395 for mesothelial cells in necrosis-induced inflammation through the recognition of IL-1 alpha  
396 released from dying cells. *J Immunol*, 181(12), 8194-8.

397 Eismayr, K., Bestehorn, A., Morelli, L., Borroni, M., Walle, L. V., Lamkanfi, M. & Kovarik, P. (2022)  
398 Nonredundancy of IL-1 $\alpha$  and IL-1 $\beta$  is defined by distinct regulation of tissues orchestrating  
399 resistance versus tolerance to infection. *Sci Adv*, 8(9), eabj7293.

400 Fettelschoss, A., Kistowska, M., LeibundGut-Landmann, S., Beer, H. D., Johansen, P., Senti, G.,  
401 Contassot, E., Bachmann, M. F., French, L. E., Oxenius, A. & Kundig, T. M. (2011) Inflammasome  
402 activation and IL-1beta target IL-1alpha for secretion as opposed to surface expression. *Proc Natl*  
403 *Acad Sci U S A*, 108(44), 18055-60.

404 Glaccum, M. B., Stocking, K. L., Charrier, K., Smith, J. L., Willis, C. R., Maliszewski, C., Livingston,  
405 D. J., Peschon, J. J. & Morrissey, P. J. (1997) Phenotypic and functional characterization of mice  
406 that lack the type I receptor for IL-1. *J Immunol*, 159(7), 3364-71.

407 Goldbach-Mansky, R., Dailey, N. J., Canna, S. W., Gelibert, A., Jones, J., Rubin, B. I., Kim, H.  
408 J., Brewer, C., Zalewski, C., Wiggs, E., Hill, S., Turner, M. L., Karp, B. I., Aksenitjevich, I., Pucino,  
409 F., Penzak, S. R., Haverkamp, M. H., Stein, L., Adams, B. S., Moore, T. L., Fuhlbrigge, R. C.,  
410 Shaham, B., Jarvis, J. N., O'Neil, K., Vehe, R. K., Beitz, L. O., Gardner, G., Hannan, W. P.,  
411 Warren, R. W., Horn, W., Cole, J. L., Paul, S. M., Hawkins, P. N., Pham, T. H., Snyder, C., Wesley,  
412 R. A., Hoffmann, S. C., Holland, S. M., Butman, J. A. & Kastner, D. L. (2006) Neonatal-onset  
413 multisystem inflammatory disease responsive to interleukin-1beta inhibition. *N Engl J Med*,  
414 355(6), 581-92.

415 Greten, F. R., Arkan, M. C., Bollrath, J., Hsu, L. C., Goode, J., Miething, C., Goktuna, S. I.,  
416 Neuenhahn, M., Fierer, J., Paxian, S., Van Rooijen, N., Xu, Y., O'Cain, T., Jaffee, B. B., Busch,  
417 D. H., Duyster, J., Schmid, R. M., Eckmann, L. & Karin, M. (2007) NF-kappaB is a negative  
418 regulator of IL-1beta secretion as revealed by genetic and pharmacological inhibition of IKKbeta.  
419 *Cell*, 130(5), 918-31.

420 Gross, O., Yazdi, A. S., Thomas, C. J., Masin, M., Heinz, L. X., Guarda, G., Quadroni, M., Drexler,  
421 S. K. & Tschopp, J. (2012) Inflammasome activators induce interleukin-1alpha secretion via  
422 distinct pathways with differential requirement for the protease function of caspase-1. *Immunity*,  
423 36(3), 388-400.

424 Gurung, P., Burton, A. & Kanneganti, T. D. (2016) NLRP3 inflammasome plays a redundant role  
425 with caspase 8 to promote IL-1beta-mediated osteomyelitis. *Proc Natl Acad Sci U S A*, 113(16),  
426 4452-7.

427 Gurung, P., Fan, G., Lukens, J. R., Vogel, P., Tonks, N. K. & Kanneganti, T. D. (2017) Tyrosine  
428 Kinase SYK Licenses MyD88 Adaptor Protein to Instigate IL-1alpha-Mediated Inflammatory  
429 Disease. *Immunity*, 46(4), 635-648.

430 Gurung, P., Malireddi, R. K., Anand, P. K., Demon, D., Vande Walle, L., Liu, Z., Vogel, P.,  
431 Lamkanfi, M. & Kanneganti, T. D. (2012) Toll or interleukin-1 receptor (TIR) domain-containing  
432 adaptor inducing interferon-beta (TRIF)-mediated caspase-11 protease production integrates  
433 Toll-like receptor 4 (TLR4) protein- and Nlrp3 inflammasome-mediated host defense against  
434 enteropathogens. *J Biol Chem*, 287(41), 34474-83.

435 Horai, R., Asano, M., Sudo, K., Kanuka, H., Suzuki, M., Nishihara, M., Takahashi, M. & Iwakura,  
436 Y. (1998) Production of mice deficient in genes for interleukin (IL)-1alpha, IL-1beta, IL-  
437 1alpha/beta, and IL-1 receptor antagonist shows that IL-1beta is crucial in turpentine-induced  
438 fever development and glucocorticoid secretion. *J Exp Med*, 187(9), 1463-75.

439 Hsu, L. C., Enzler, T., Seita, J., Timmer, A. M., Lee, C. Y., Lai, T. Y., Yu, G. Y., Lai, L. C., Temkin,  
440 V., Sinzig, U., Aung, T., Nizet, V., Weissman, I. L. & Karin, M. (2011) IL-1 $\beta$ -driven neutrophilia  
441 preserves antibacterial defense in the absence of the kinase IKK $\beta$ . *Nat Immunol*, 12(2), 144-50.

442 Kanneganti, T. D. (2010) Central roles of NLRs and inflammasomes in viral infection. *Nat Rev*  
443 *Immunol*, 10(10), 688-98.

444 Kaplanski, G., Farnarier, C., Kaplanski, S., Porat, R., Shapiro, L., Bongrand, P. & Dinarello, C. A.  
445 (1994) Interleukin-1 induces interleukin-8 secretion from endothelial cells by a juxtacrine  
446 mechanism. *Blood*, 84(12), 4242-8.

447 Kayagaki, N., Stowe, I. B., Lee, B. L., O'Rourke, K., Anderson, K., Warming, S., Cuellar, T., Haley,  
448 B., Roose-Girma, M., Phung, Q. T., Liu, P. S., Lill, J. R., Li, H., Wu, J., Kummerfeld, S., Zhang,  
449 J., Lee, W. P., Snipas, S. J., Salvesen, G. S., Morris, L. X., Fitzgerald, L., Zhang, Y., Bertram, E.

450 M., Goodnow, C. C. & Dixit, V. M. (2015) Caspase-11 cleaves gasdermin D for non-canonical  
451 inflammasome signalling. *Nature*, 526(7575), 666-71.

452 Kono, H., Karmarkar, D., Iwakura, Y. & Rock, K. L. (2010) Identification of the cellular sensor that  
453 stimulates the inflammatory response to sterile cell death. *J Immunol*, 184(8), 4470-8.

454 Kupper, T. S., Ballard, D. W., Chua, A. O., McGuire, J. S., Flood, P. M., Horowitz, M. C., Langdon,  
455 R., Lightfoot, L. & Gubler, U. (1986) Human keratinocytes contain mRNA indistinguishable from  
456 monocyte interleukin 1 alpha and beta mRNA. Keratinocyte epidermal cell-derived thymocyte-  
457 activating factor is identical to interleukin 1. *J Exp Med*, 164(6), 2095-100.

458 Kurt-Jones, E. A., Beller, D. I., Mizel, S. B. & Unanue, E. R. (1985) Identification of a membrane-  
459 associated interleukin 1 in macrophages. *Proc Natl Acad Sci U S A*, 82(4), 1204-8.

460 Kyriazopoulou, E., Poulakou, G., Milionis, H., Metallidis, S., Adamis, G., Tsiakos, K., Fragkou, A.,  
461 Rapti, A., Damoulari, C., Fantoni, M., Kalomenidis, I., Chrysos, G., Angheben, A., Kainis, I.,  
462 Alexiou, Z., Castelli, F., Serino, F. S., Tsilika, M., Bakakos, P., Nicastrì, E., Tzavara, V., Kostis,  
463 E., Dagna, L., Koufargyris, P., Dimakou, K., Savvanis, S., Tzatzagou, G., Chini, M., Cavalli, G.,  
464 Bassetti, M., Katrini, K., Kotsis, V., Tsoukalas, G., Selmi, C., Bliziotis, I., Samarkos, M., Doulas,  
465 M., Ktena, S., Masgala, A., Papanikolaou, I., Kosmidou, M., Myrodi, D. M., Argyraki, A.,  
466 Cardellino, C. S., Koliakou, K., Katsigianni, E. I., Rapti, V., Giannitsioti, E., Cingolani, A., Micha,  
467 S., Akinosoglou, K., Liatsis-Douvitsas, O., Symbardi, S., Gatselis, N., Mouktaroudi, M., Ippolito,  
468 G., Florou, E., Kotsaki, A., Netea, M. G., Eugen-Olsen, J., Kyprianou, M., Panagopoulos, P.,  
469 Dalekos, G. N. & Giamarellos-Bourboulis, E. J. (2021) Early treatment of COVID-19 with anakinra  
470 guided by soluble urokinase plasminogen receptor plasma levels: a double-blind, randomized  
471 controlled phase 3 trial. *Nat Med*, 27(10), 1752-1760.

472 Labow, M., Shuster, D., Zetterstrom, M., Nunes, P., Terry, R., Cullinan, E. B., Bartfai, T.,  
473 Solorzano, C., Moldawer, L. L., Chizzonite, R. & McIntyre, K. W. (1997) Absence of IL-1 signaling  
474 and reduced inflammatory response in IL-1 type I receptor-deficient mice. *J Immunol*, 159(5),  
475 2452-61.

476 Lomedico, P. T., Gubler, U., Hellmann, C. P., Dukovich, M., Giri, J. G., Pan, Y. C., Collier, K.,  
477 Semionow, R., Chua, A. O. & Mizel, S. B. (1984) Cloning and expression of murine interleukin-1  
478 cDNA in *Escherichia coli*. *Nature*, 312(5993), 458-62.

479 Lukens, J. R., Gross, J. M., Calabrese, C., Iwakura, Y., Lamkanfi, M., Vogel, P. & Kanneganti, T.  
480 D. (2014a) Critical role for inflammasome-independent IL-1beta production in osteomyelitis. *Proc*  
481 *Natl Acad Sci U S A*, 111(3), 1066-71.

482 Lukens, J. R., Gross, J. M. & Kanneganti, T. D. (2012) IL-1 family cytokines trigger sterile  
483 inflammatory disease. *Front Immunol*, 3, 315.

484 Lukens, J. R., Gurung, P., Vogel, P., Johnson, G. R., Carter, R. A., McGoldrick, D. J., Bandi, S.  
485 R., Calabrese, C. R., Vande Walle, L., Lamkanfi, M. & Kanneganti, T. D. (2014b) Dietary  
486 modulation of the microbiome affects autoinflammatory disease. *Nature*, 516(7530), 246-9.

487 Lukens, J. R., Vogel, P., Johnson, G. R., Kelliher, M. A., Iwakura, Y., Lamkanfi, M. & Kanneganti,  
488 T. D. (2013) RIP1-driven autoinflammation targets IL-1alpha independently of inflammasomes  
489 and RIP3. *Nature*, 498(7453), 224-7.

490 Malik, A. & Kanneganti, T. D. (2018) Function and regulation of IL-1alpha in inflammatory  
491 diseases and cancer. *Immunol Rev*, 281(1), 124-137.

492 Malik, A., Sharma, D., Zhu, Q., Karki, R., Guy, C. S., Vogel, P. & Kanneganti, T. D. (2016) IL-33  
493 regulates the IgA-microbiota axis to restrain IL-1alpha-dependent colitis and tumorigenesis. *J Clin*  
494 *Invest*, 126(12), 4469-4481.

495 Mantovani, A., Dinarello, C. A., Molgora, M. & Garlanda, C. (2019) Interleukin-1 and Related  
496 Cytokines in the Regulation of Inflammation and Immunity. *Immunity*, 50(4), 778-795.

497 Matsuki, T., Nakae, S., Sudo, K., Horai, R. & Iwakura, Y. (2006) Abnormal T cell activation caused  
498 by the imbalance of the IL-1/IL-1R antagonist system is responsible for the development of  
499 experimental autoimmune encephalomyelitis. *Int Immunol*, 18(2), 399-407.

500 Pelletier, S., Gingras, S. & Green, D. R. (2015) Mouse genome engineering via CRISPR-Cas9  
501 for study of immune function. *Immunity*, 42(1), 18-27.

502 Place, D. E. & Kanneganti, T. D. (2019) Cell death-mediated cytokine release and its therapeutic  
503 implications. *J Exp Med*, 216(7), 1474-1486.

504 Ridker, P. M., Everett, B. M., Thuren, T., MacFadyen, J. G., Chang, W. H., Ballantyne, C.,  
505 Fonseca, F., Nicolau, J., Koenig, W., Anker, S. D., Kastelein, J. J. P., Cornel, J. H., Pais, P., Pella,  
506 D., Genest, J., Cifkova, R., Lorenzatti, A., Forster, T., Kobalava, Z., Vida-Simiti, L., Flather, M.,  
507 Shimokawa, H., Ogawa, H., Dellborg, M., Rossi, P. R. F., Troquay, R. P. T., Libby, P., Glynn, R.  
508 J. & Group, C. T. (2017a) Antiinflammatory Therapy with Canakinumab for Atherosclerotic  
509 Disease. *N Engl J Med*, 377(12), 1119-1131.

510 Ridker, P. M., MacFadyen, J. G., Thuren, T., Everett, B. M., Libby, P., Glynn, R. J. & Group, C.  
511 T. (2017b) Effect of interleukin-1beta inhibition with canakinumab on incident lung cancer in  
512 patients with atherosclerosis: exploratory results from a randomised, double-blind, placebo-  
513 controlled trial. *Lancet*, 390(10105), 1833-1842.

514 Ridker, P. M., Thuren, T., Zalewski, A. & Libby, P. (2011) Interleukin-1beta inhibition and the  
515 prevention of recurrent cardiovascular events: rationale and design of the Canakinumab Anti-  
516 inflammatory Thrombosis Outcomes Study (CANTOS). *Am Heart J*, 162(4), 597-605.

517 Sakurai, T., He, G., Matsuzawa, A., Yu, G. Y., Maeda, S., Hardiman, G. & Karin, M. (2008)  
518 Hepatocyte necrosis induced by oxidative stress and IL-1 alpha release mediate carcinogen-  
519 induced compensatory proliferation and liver tumorigenesis. *Cancer Cell*, 14(2), 156-65.

520 Shi, J., Zhao, Y., Wang, K., Shi, X., Wang, Y., Huang, H., Zhuang, Y., Cai, T., Wang, F. & Shao,  
521 F. (2015) Cleavage of GSDMD by inflammatory caspases determines pyroptotic cell death.  
522 *Nature*, 526(7575), 660-5.

523 Shornick, L. P., De Togni, P., Mariathasan, S., Goellner, J., Strauss-Schoenberger, J., Karr, R.  
524 W., Ferguson, T. A. & Chaplin, D. D. (1996) Mice deficient in IL-1beta manifest impaired contact  
525 hypersensitivity to trinitrochlorobenzene. *J Exp Med*, 183(4), 1427-36.

526 Smith, J. W., 2nd, Longo, D. L., Alvord, W. G., Janik, J. E., Sharfman, W. H., Gause, B. L., Curti,  
527 B. D., Creekmore, S. P., Holmlund, J. T., Fenton, R. G. & et al. (1993) The effects of treatment

528 with interleukin-1 alpha on platelet recovery after high-dose carboplatin. *N Engl J Med*, 328(11),  
529 756-61.

530 Thornton, P., McColl, B. W., Greenhalgh, A., Denes, A., Allan, S. M. & Rothwell, N. J. (2010)  
531 Platelet interleukin-1alpha drives cerebrovascular inflammation. *Blood*, 115(17), 3632-9.

532 Tweedell, R. E., Malireddi, R. K. S. & Kanneganti, T. D. (2020) A comprehensive guide to studying  
533 inflammasome activation and cell death. *Nat Protoc*, 15(10), 3284-3333.

534 Warner, S. J., Auger, K. R. & Libby, P. (1987) Interleukin 1 induces interleukin 1. II. Recombinant  
535 human interleukin 1 induces interleukin 1 production by adult human vascular endothelial cells. *J*  
536 *Immunol*, 139(6), 1911-7.

537



**A**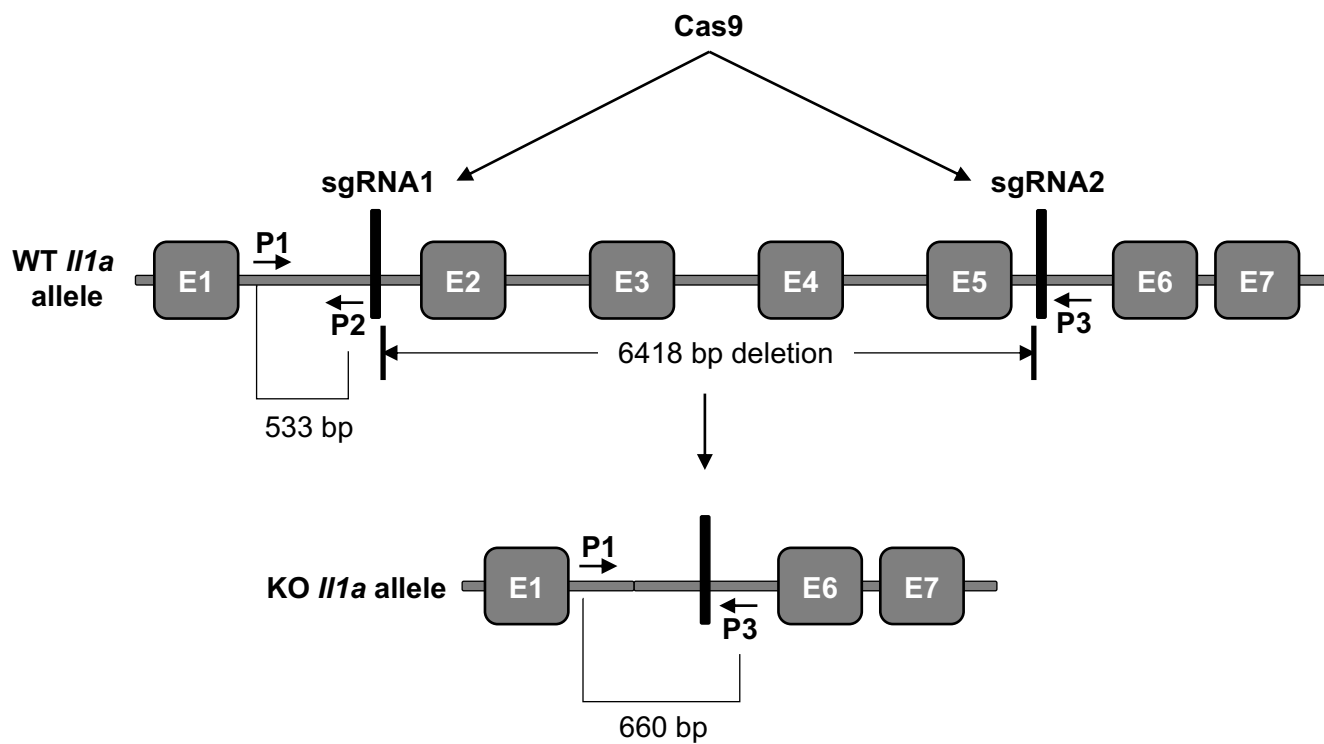**B**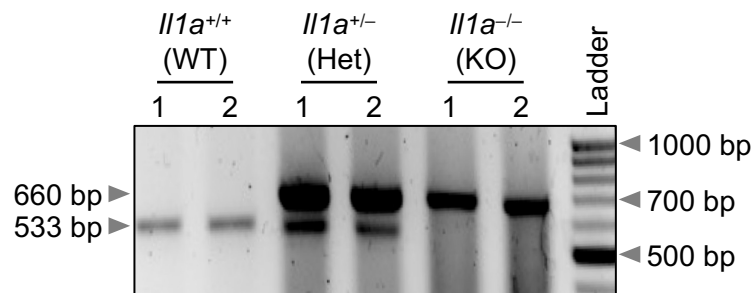**Figure 1**

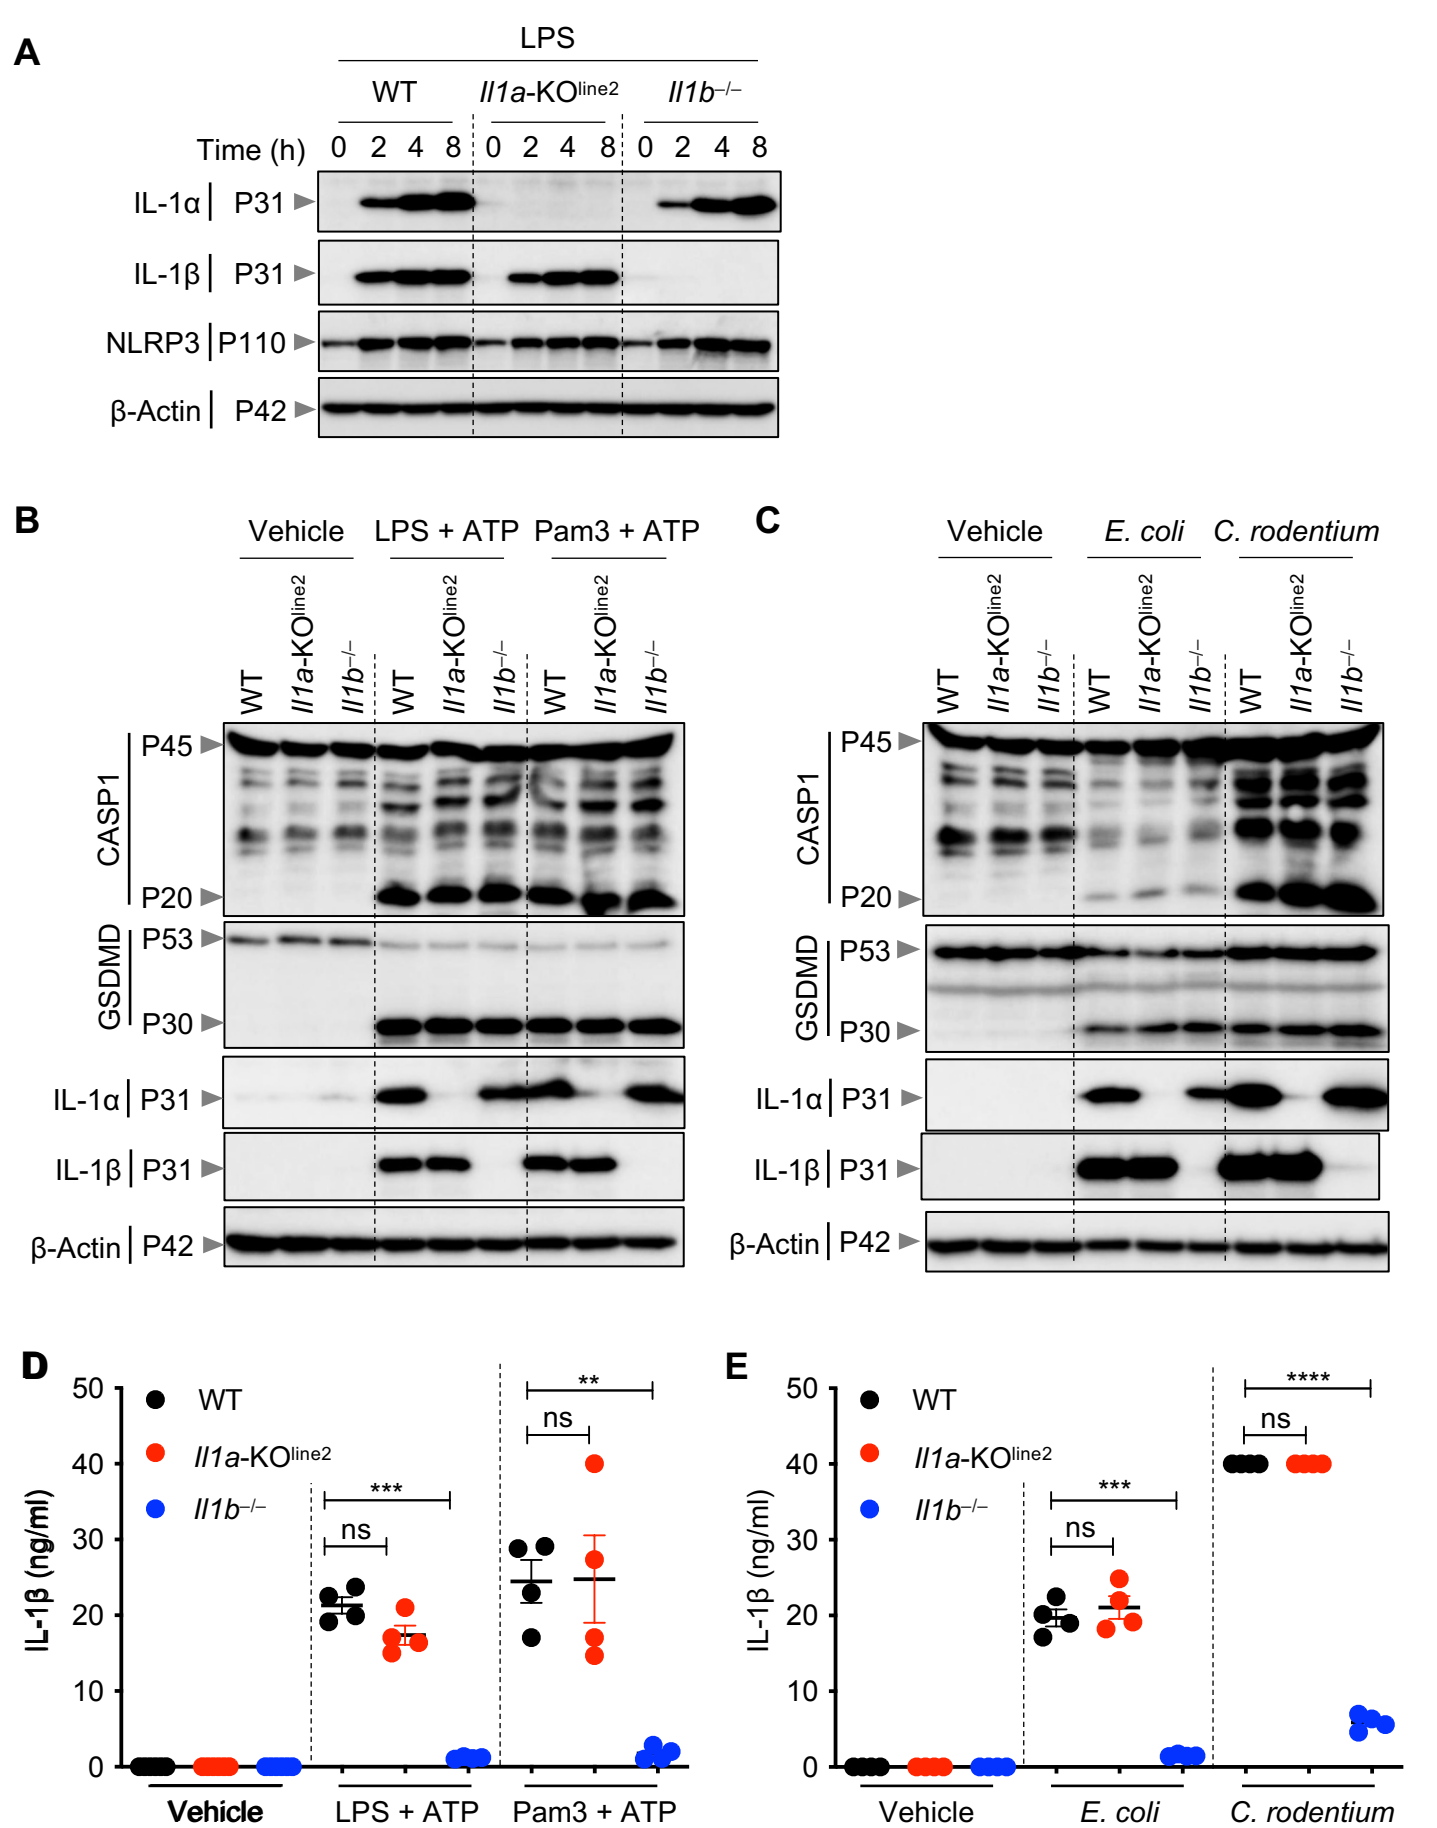

**Figure 2**

**A**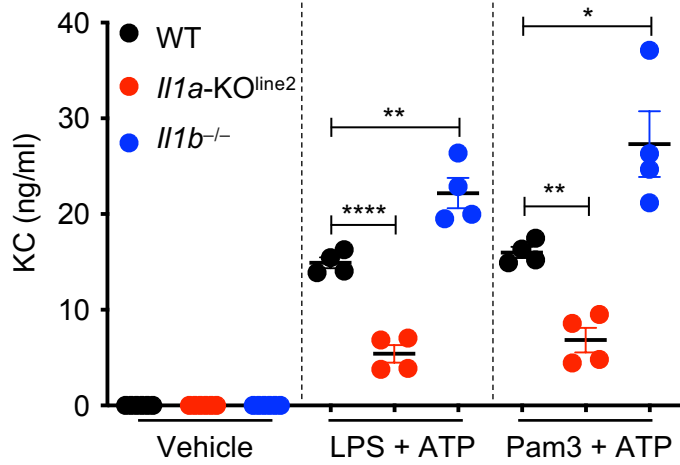**C**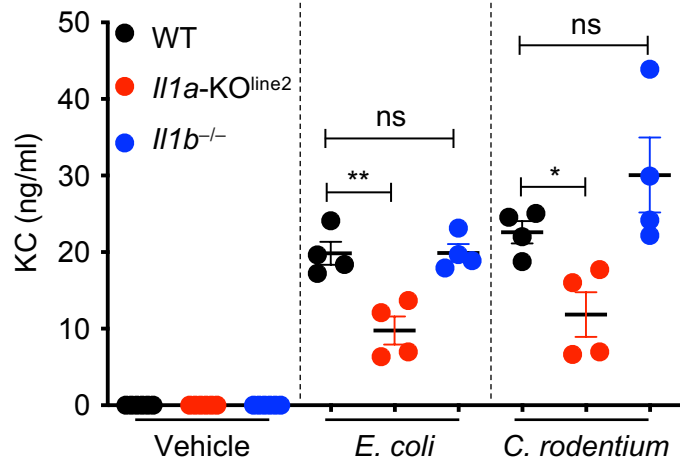**B**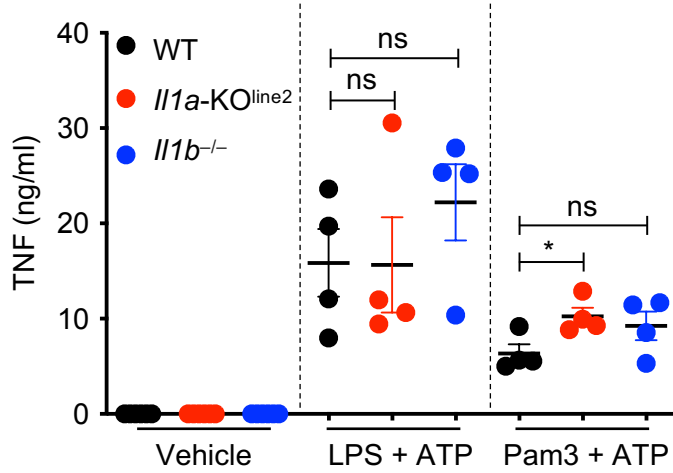**D**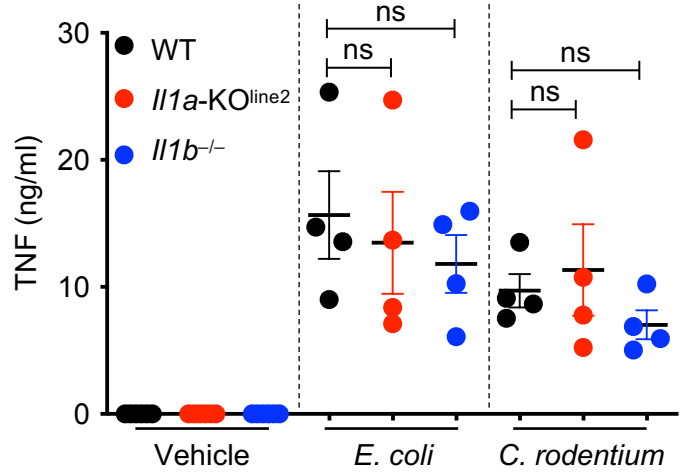**Figure 3**
