# Supplementary material for: Determining distinct roles of IL-1α through generation of an IL-1α knockout mouse with no defect in IL-1β expression
Source: bioRxiv or medRxiv preprint supplement (doi:10.1101/2022.09.21.508892), 2022-09-21

**A**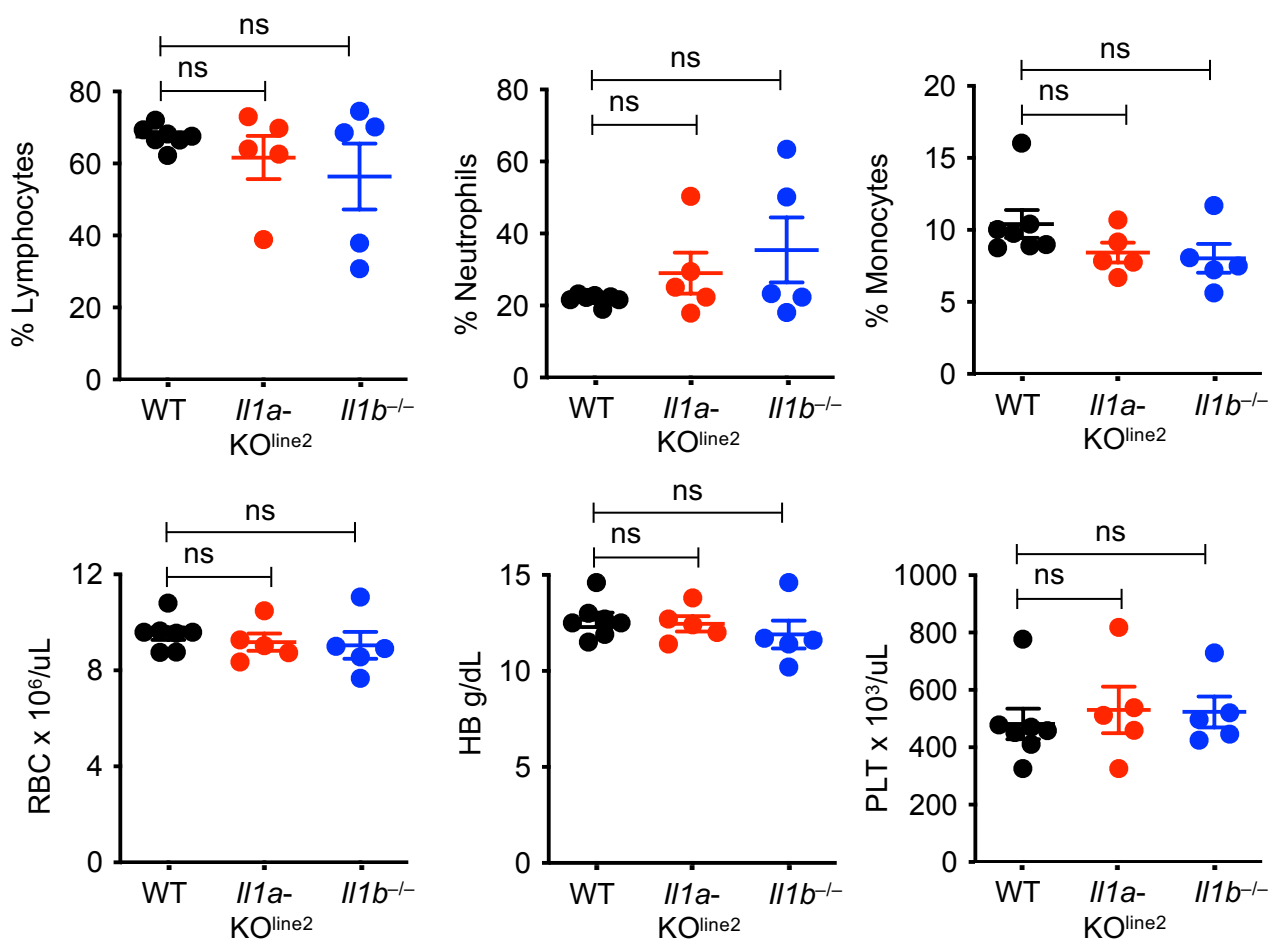**B**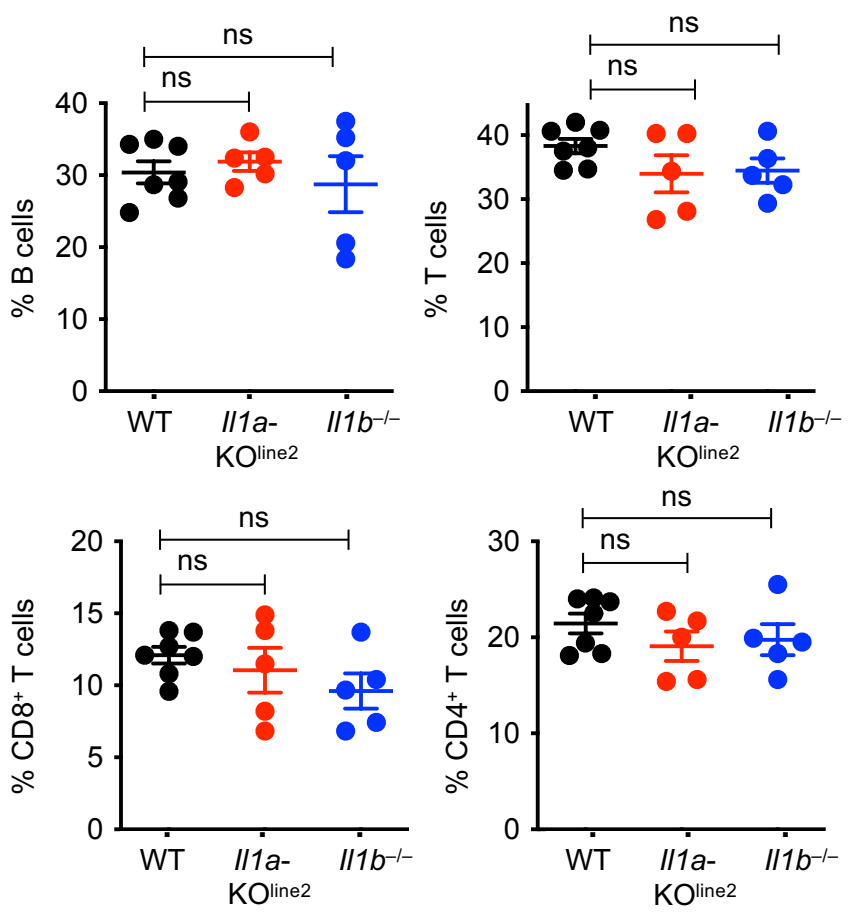

Supplement: Supplementary file [file media-1.pdf]
